# Supplementary material for: Layered electrides as fluoride intercalation anodes
Source: Royal Society of Chemistry journal article supplement (doi:10.1039/d0ta06162j), 2020-01-01
Supplement: d0ta06162j1.pdf [file d0ta06162j1.pdf]

# Supporting Information for

## Layered Electrides as Fluoride Intercalation

### Anodes

*Steven T. Hartman,<sup>†,‡</sup> and Rohan Mishra<sup>‡,†,\*</sup>*

<sup>†</sup>Institute of Materials Science and Engineering, Washington University in St. Louis, One  
Brookings Drive, St. Louis, MO 63130, USA

<sup>‡</sup>Department of Mechanical Engineering and Materials Science, Washington University in St.  
Louis, One Brookings Drive, St. Louis, MO 63130, USA

\*Email: S.T.H. ([steven.t.hartman@wustl.edu](mailto:steven.t.hartman@wustl.edu)) or R.M. ([rmishra@wustl.edu](mailto:rmishra@wustl.edu))

Table S1. Performance metrics of other fluorine intercalation electrodes calculated in this study or derived from the Materials Project database.<sup>1</sup> The fractional volume change is given relative to the unfluoridated material.

| Compound                          | Mass<br>g/mol F | Gravimetric         |                        | Delta vol. | E above hull<br>(eV/atom) |
|-----------------------------------|-----------------|---------------------|------------------------|------------|---------------------------|
|                                   |                 | capacity<br>(mAh/g) | V vs. PbF <sub>2</sub> |            |                           |
| Ca <sub>2</sub> NF                | 94.16           | 284.63              | -2.31                  | -0.13      | 0.00                      |
| CaF <sub>2</sub>                  | 40.08           | 668.73              | -2.32                  | -0.01      | 0.00                      |
| LiF                               | 6.94            | 3861.88             | -2.31                  | -0.15      | 0.00                      |
| Sr <sub>2</sub> NF                | 189.25          | 141.62              | -2.21                  | -0.13      | 0.00                      |
| Ba <sub>2</sub> LiNF <sub>2</sub> | 147.80          | 181.33              | -2.05                  | -0.09      | 0.07                      |
| Ba <sub>3</sub> NF <sub>3</sub>   | 142.00          | 188.75              | -2.02                  | -0.01      | 0.06                      |

| Compound    | Mass<br>g/mol F | Gravimetric         |                                   | E above hull<br>(eV/atom) |
|-------------|-----------------|---------------------|-----------------------------------|---------------------------|
|             |                 | capacity<br>(mAh/g) | V vs. PbF <sub>2</sub> Delta vol. |                           |
| Y2CF2       | 94.91           | 282.38              | -2.01 0.09                        | 0.00                      |
| Ba2NaOF3    | 104.55          | 256.35              | -1.90 -0.24                       | 0.06                      |
| Sr2TiO3F2   | 135.55          | 197.72              | -1.89 0.23                        | 0.06                      |
| MgF2        | 24.31           | 1102.71             | -1.72 0.50                        | 0.00                      |
| SrSiF       | 115.71          | 231.63              | -1.55 0.14                        | 0.13                      |
| BaSiF       | 165.42          | 162.02              | -1.51 0.17                        | 0.14                      |
| LaSiF       | 166.99          | 160.50              | -1.47 0.15                        | 0.06                      |
| CaSiF       | 68.16           | 393.19              | -1.37 0.16                        | 0.15                      |
| Zr2CF2      | 97.22           | 275.67              | -1.07 0.37                        | 0.00                      |
| Ti2CF2      | 53.87           | 497.50              | -0.95 0.50                        | 0.00                      |
| LaH2F       | 140.93          | 190.18              | -0.91 0.00                        | 0.17                      |
| Sr2FeO3F    | 279.09          | 96.03               | -0.78 0.09                        | 0.00                      |
| Ti2NF2      | 54.87           | 488.45              | -0.71 0.57                        | 0.03                      |
| K6Fe2O5F2   | 213.14          | 125.75              | -0.67 0.07                        | 0.12                      |
| Na4SnO3F2   | 129.34          | 207.23              | -0.56 0.00                        | 0.18                      |
| NaSnNF2     | 77.85           | 344.27              | -0.45 0.31                        | 0.05                      |
| NaSnPF2     | 86.34           | 310.43              | -0.04 0.29                        | 0.16                      |
| PbF2        | 103.60          | 258.70              | 0.00 0.67                         | 0.00                      |
| ZnF2        | 32.70           | 819.74              | 0.13 1.36                         | 0.00                      |
| K2Sn2O3F3   | 121.21          | 221.12              | 0.14 0.06                         | 0.14                      |
| SnF2        | 59.09           | 453.61              | 0.17 0.58                         | 0.00                      |
| BiF3        | 69.66           | 384.75              | 0.32 0.59                         | 0.00                      |
| KSbO2F2     | 96.43           | 277.94              | 0.37 0.28                         | 0.00                      |
| Sr2CrO4F2   | 145.62          | 184.05              | 0.55 0.36                         | 0.14                      |
| La2CoO4F    | 400.75          | 66.88               | 0.55 0.04                         | 0.10                      |
| La2CoO4F2   | 200.38          | 133.76              | 0.63 0.17                         | 0.05                      |
| Sn2OF5      | 97.14           | 275.91              | 0.67 0.21                         | 0.00                      |
| KSnF5       | 107.40          | 249.54              | 0.82 0.28                         | 0.00                      |
| KAsOF4      | 85.01           | 315.28              | 0.83 -0.01                        | 0.06                      |
| TiSn2O4F    | 349.29          | 76.73               | 0.88 0.08                         | 0.08                      |
| MgFeSb4O8F2 | 173.80          | 77.11               | 1.06 0.01                         | 0.11                      |
| CaSn2F8     | 195.74          | 136.92              | 1.08 0.11                         | 0.09                      |
| KAsO2F      | 146.02          | 183.55              | 1.16 0.10                         | 0.09                      |
| FeSb2O4F    | 363.41          | 73.75               | 1.18 -0.01                        | 0.08                      |
| KVOF4       | 163.03          | 164.39              | 1.32 0.18                         | 0.00                      |
| CuF2        | 31.77           | 843.53              | 1.33 1.99                         | 0.00                      |
| Ca2MnO4F2   | 99.55           | 269.23              | 1.40 0.43                         | 0.10                      |
| SrCuO2      | 183.17          | 146.32              | 1.42 0.11                         | 0.17                      |

|            |        |        |      |      |      |
|------------|--------|--------|------|------|------|
| FeAsO4F4   | 48.69  | 550.43 | 1.47 | 0.60 | 0.11 |
| SrSbF7     | 152.19 | 176.11 | 1.57 | 0.07 | 0.00 |
| Mg2MnN2    | 131.56 | 203.72 | 1.59 | 0.09 | 0.26 |
| NaCuOF1.25 | 82.03  | 326.73 | 1.63 | 0.15 | 0.21 |

**S2:** We tested the effect of van der Waals forces using the dispersion correction of Tkatchenko and Scheffler (IVDW = 20 in VASP).<sup>2</sup> The change in structural parameters are shown in Table S2 for Ca<sub>2</sub>N and Y<sub>2</sub>C. Because the correction did not systematically improve agreement with experiment, we did not apply it to the calculations discussed in the main text.

Table S2: Theoretical cell volume and *c*-axis length for relevant electrode materials, with or without van der Waals interactions, compared to experimental values.

| Compound                                    | Volume (PBE)         | Volume (IVDW=20)     | Volume (Exp.)                | <i>c</i> -axis (PBE) | <i>c</i> -axis (IVDW=20) | <i>c</i> -axis (Exp.) |
|---------------------------------------------|----------------------|----------------------|------------------------------|----------------------|--------------------------|-----------------------|
| Ca <sub>2</sub> N <sup>3</sup>              | 217.0 Å <sup>3</sup> | 199.9 Å <sup>3</sup> | 216.6 Å <sup>3</sup> (2 K)   | 19.24 Å              | 18.81 Å                  | 19.06 Å               |
| Ca <sub>2</sub> NF                          | 189.5 Å <sup>3</sup> | 172.2 Å <sup>3</sup> | N/A                          | 17.43 Å              | 16.66 Å                  | N/A                   |
| Y <sub>2</sub> C <sup>4</sup>               | 208.5 Å <sup>3</sup> | 191.0 Å <sup>3</sup> | 203.5 Å <sup>3</sup> (298 K) | 18.41 Å              | 17.67 Å                  | 17.96 Å               |
| Y <sub>2</sub> CF <sub>2</sub> <sup>5</sup> | 75.50 Å <sup>3</sup> | 72.26 Å <sup>3</sup> | 73.25 Å <sup>3</sup> (300 K) | 6.453 Å              | 6.394 Å                  | 6.297 Å               |

**S3:** We list below the most favorable decomposition pathways identified by the Materials Project, and their decomposition energies. Positive values correspond to stable materials which are on the convex hull.

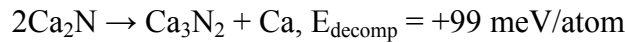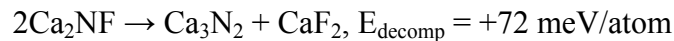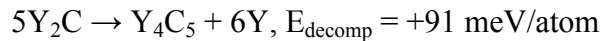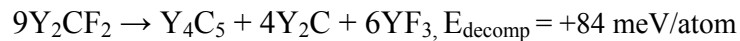

**S4:** In this section, we provide the data and fitting plots obtained from AIMD simulations, which we used to obtain the diffusivity and the activation energy for diffusion in  $\text{Y}_2\text{CF}_2$ .

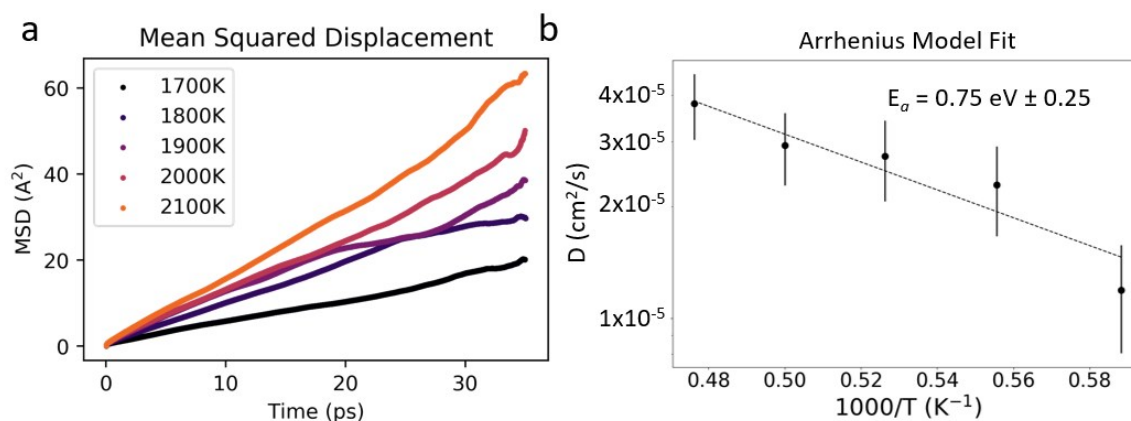

Figure S1: a. Mean squared displacement over time for MD simulations of stoichiometric  $\text{Y}_2\text{CF}_2$  at different temperatures. b. The Arrhenius relationship of diffusivity vs. temperature using the data derived from a.

### Additional References

1. A. Jain, S. P. Ong, G. Hautier, W. Chen, W. D. Richards, S. Dacek, S. Cholia, D. Gunter, D. Skinner, G. Ceder and K. A. Persson, *APL Materials*, 2013, **1**, 011002.
2. A. Tkatchenko and M. Scheffler, *Phys. Rev. Lett.*, 2009, **102**, 073005.
3. D. H. Gregory, A. Bowman, C. F. Baker and D. P. Weston, *Journal of Materials Chemistry*, 2000, **10**, 1635-1641.
4. M. Atoji and M. Kikuchi, *The Journal of Chemical Physics*, 1969, **51**, 3863-3872.
5. D. L. Druffel, M. G. Lanetti, J. D. Sundberg, J. T. Pawlik, M. S. Stark, C. L. Donley, L. M. McRae, K. M. Scott and S. C. Warren, *Chemistry of Materials*, 2019, DOI: 10.1021/acs.chemmater.9b03722.
